# Supplementary material
Source: PubMed Central journal article supplement (PMC7948186)
Supplement: gutjnl-2020-323020supp002.pdf [file gutjnl-2020-323020supp002.pdf]

Gut microbiota composition reflects disease severity and dysfunctional immune responses in COVID-19 patients

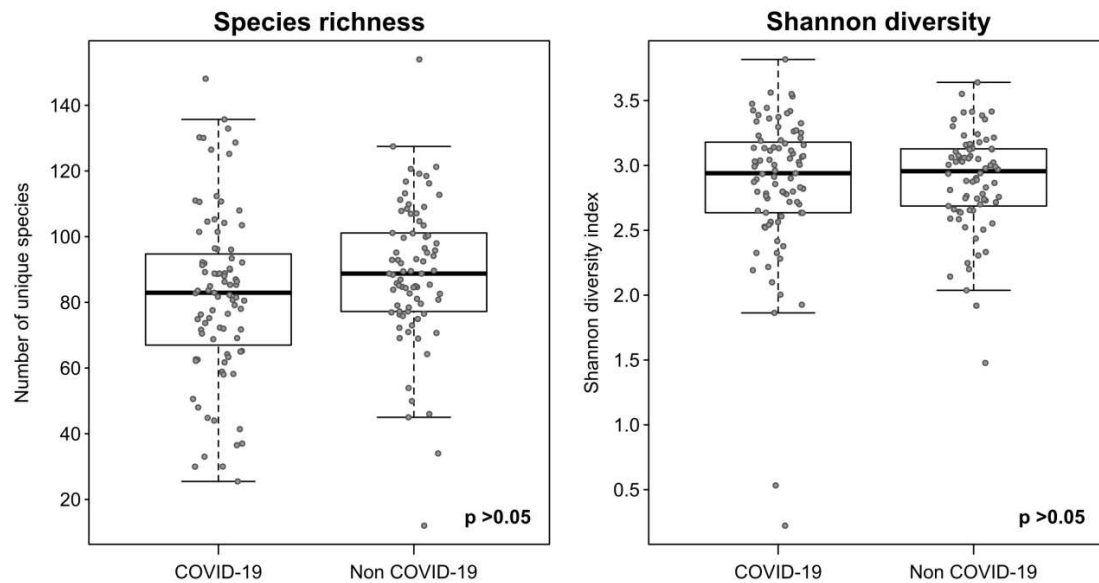

**Figure S1.** Alpha diversity metrics of gut microbiota composition in COVID-19 and non COVID-19 individuals from Hong Kong. Left panel is a box and whisker plot showing number of unique species detected in the two cohorts, while right panel shows the Shannon diversity index. The thick centre lines within each boxplot rectangle represent median values, and the two ends of the rectangle represent upper and lower quartiles, respectively. The upper whisker extends to the highest value within 1.5x the interquartile range above the upper quartile, whereas the lower whisker extends to the lowest value within 1.5x the interquartile range below the lower quartile. All data points are represented by grey circles. Comparisons between COVID-19 and non COVID-19 cohorts were performed using a Mann-Whitney test.
